# Supplementary material for: The molecular determinants of R-roscovitine block of hERG channels
Source: PubMed Central journal article supplement (PMC6719874; doi:10.1371/journal.pone.0217733), 2019-09-03
Supplement: pone.0217733.s001.pdf [file pone.0217733.s001.pdf]

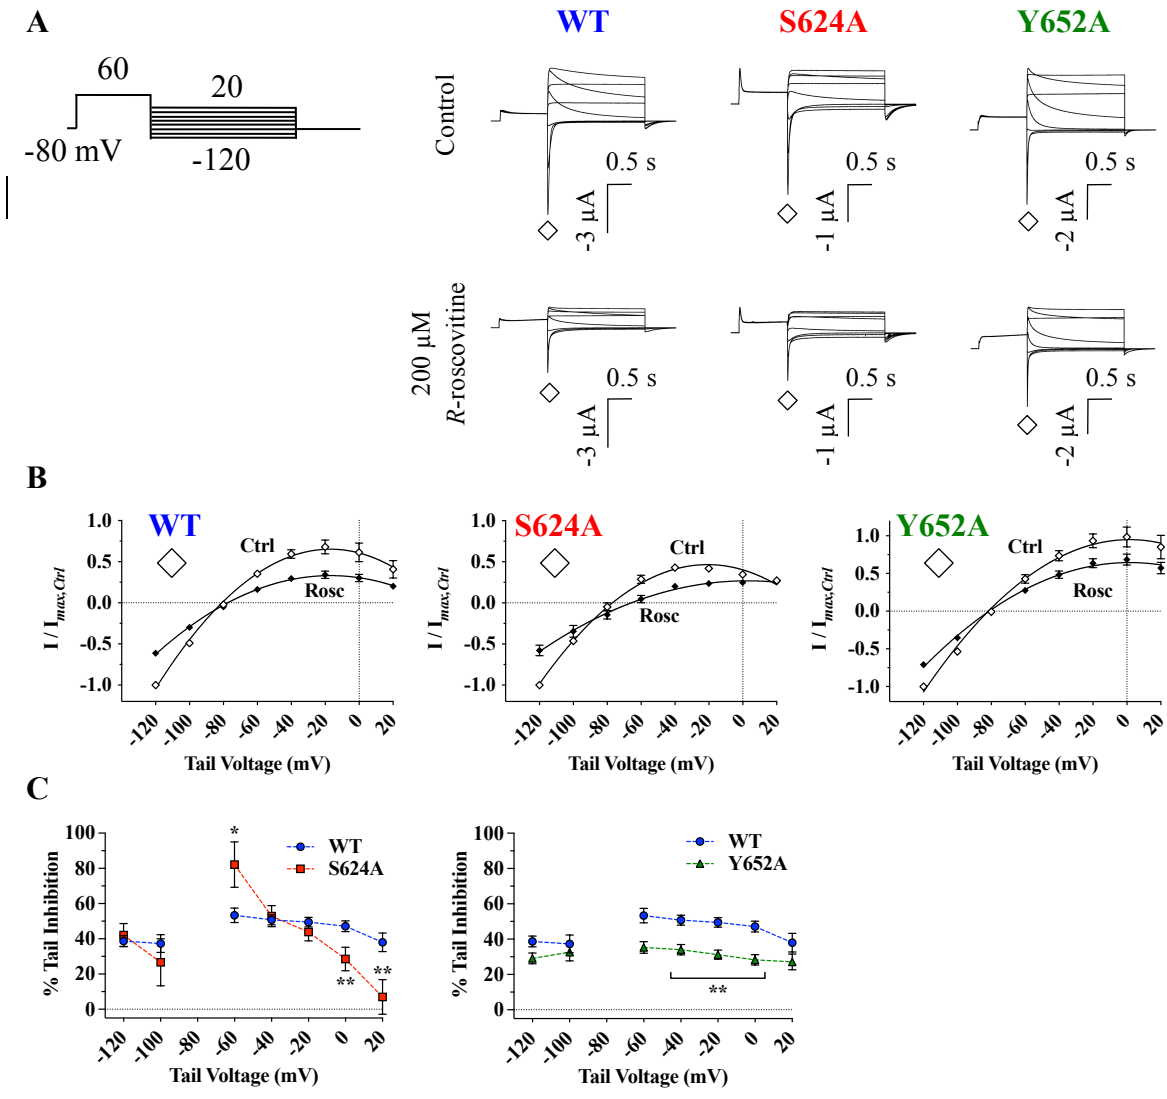

**Supplementary Figure 1. Step Repolarization Protocols for WT, S624A, and Y652A in the presence or absence of *R*-roscovitine.**

**A)** Representative current traces elicited from the step repolarization voltage protocol shown to the left. WT, S624A, and Y652A tail currents were measured at their peak ( $\diamond$ ) in the absence (top row) and presence of 200  $\mu$ M *R*-roscovitine (bottom row). **B)** Maximal tail current amplitudes from A were plotted against the repolarization voltage to show reversal potentials, which were then compared between control and *R*-roscovitine. The shifts for WT ( $E_{rev} = -80.16 \pm 1.31$  to  $-76.7 \pm 1.33$  mV;  $p = 0.0294$ , paired *t*-test) and S624A ( $E_{rev} = -82.25 \pm 1.27$  mV to  $-77.17 \pm 2.00$  mV;  $p = 0.0301$ , paired *t*-test) were significant, but not for Y652A ( $E_{rev} = -81.08 \pm 1.28$  mV to  $-80.61 \pm 2.12$  mV;  $p = 0.6238$ , paired *t*-test). **C)** Percent inhibition of tail currents during the step repolarization protocol, which were calculated from the values in B (\* =  $P < 0.05$ , \*\* =  $P < 0.01$ ; one-way ANOVAs).  $n_{WT} = 14$ , and  $n_{S624A, Y652A} = 9$ .
